# Supplementary material
Source: PubMed Central journal article supplement (PMC140501)
Supplement: nar_31_2_743__1.pdf [file nar_31_2_743__1.pdf]

## Plasmids used in this work

| Plasmid name                | Relevant characteristic <sup>a</sup> | Drug resistance | Reference, source or short description/construction                                                                                                                                                                                                                                                                                                                                                                                                                                                                                                                                                                                                                                                                            |
|-----------------------------|--------------------------------------|-----------------|--------------------------------------------------------------------------------------------------------------------------------------------------------------------------------------------------------------------------------------------------------------------------------------------------------------------------------------------------------------------------------------------------------------------------------------------------------------------------------------------------------------------------------------------------------------------------------------------------------------------------------------------------------------------------------------------------------------------------------|
| pUC19                       | -                                    | Ap              | (1)                                                                                                                                                                                                                                                                                                                                                                                                                                                                                                                                                                                                                                                                                                                            |
| pACYC184                    | -                                    | Cm, Tc          | (2)                                                                                                                                                                                                                                                                                                                                                                                                                                                                                                                                                                                                                                                                                                                            |
| pBR322                      | -                                    | Ap, Tc          | (3)                                                                                                                                                                                                                                                                                                                                                                                                                                                                                                                                                                                                                                                                                                                            |
| pZS*24-MCS-1                | -                                    | Km              | (4)                                                                                                                                                                                                                                                                                                                                                                                                                                                                                                                                                                                                                                                                                                                            |
| pNM481, pNM482              | ' <i>lacZ</i>                        | Ap              | (5)                                                                                                                                                                                                                                                                                                                                                                                                                                                                                                                                                                                                                                                                                                                            |
| pEsp1396                    | <i>R M C</i>                         | -               | Plasmid which occurs naturally in <i>Enterobacter</i> sp. RFL1396 and codes for <i>Esp1396I</i> RM system                                                                                                                                                                                                                                                                                                                                                                                                                                                                                                                                                                                                                      |
| pEsp1396IRM5.6              | <i>R M C</i>                         | Ap              | <i>Bgl</i> II-linearized pEsp1396 was ligated with the <i>Bam</i> HI-cleaved pUC19                                                                                                                                                                                                                                                                                                                                                                                                                                                                                                                                                                                                                                             |
| pACNM481, pACNM482          | ' <i>lacZ</i>                        | Tc              | The DNA fragment harboring ' <i>lacZ</i> gene was subcloned from high copy number plasmids pNM481 or pNM482 to low copy number vector pACYC184 to yield plasmids pACNM481 and pACNM482, respectively ( <i>Bsp</i> 119I- <i>Eco</i> RI DNA fragment of 3.55-kb either from pNM481 or from pNM482 replaced the <i>Bst</i> 1107I- <i>Eco</i> RI DNA fragment of pACYC184; <i>Bsp</i> 119I-generated cohesive DNA ends were blunted)                                                                                                                                                                                                                                                                                               |
| pBR-C                       | <i>C</i>                             | Ap              | <i>Mun</i> I- <i>Sca</i> I DNA fragment of 0.54-kb from pEsp1396IRM5.6 was ligated with the <i>Eco</i> RI- <i>Eco</i> 32I DNA fragment of 4.17-kb from pBR322                                                                                                                                                                                                                                                                                                                                                                                                                                                                                                                                                                  |
| pEspM::Lac <sup>b</sup>     | <i>M</i> ::' <i>lacZ</i>             | Tc              | <i>Psu</i> I DNA fragment of 0.21-kb from pEsp1396IRM5.6 was ligated into <i>Bam</i> HI-cleaved pACNM481                                                                                                                                                                                                                                                                                                                                                                                                                                                                                                                                                                                                                       |
| pEspCR::Lac                 | <i>C R</i> ::' <i>lacZ</i>           | Tc              | <i>Mun</i> I- <i>Xho</i> I DNA fragment of 0.96-kb from pEsp1396IRM5.6 was ligated into <i>Eco</i> RI- <i>Sal</i> I cleaved pACNM482                                                                                                                                                                                                                                                                                                                                                                                                                                                                                                                                                                                           |
| pEspC::Lac                  | <i>C</i> ::' <i>lacZ</i>             | Tc              | <i>Mun</i> I- <i>Xba</i> I DNA fragment of 0.33-kb from pEsp1396IRM5.6 was ligated into <i>Eco</i> RI- <i>Sma</i> I cleaved pACNM481 (sticky DNA ends produced by <i>Xba</i> I were blunted)                                                                                                                                                                                                                                                                                                                                                                                                                                                                                                                                   |
| pEsp <sup>+4</sup> CR::Lac  | <i>R</i> ::' <i>lacZ</i>             | Tc              | Obtained after the digestion of pEspCR::Lac with <i>Xba</i> I (which possesses a unique target within the <i>esp1396IC</i> ) followed by filling-in and re-circularization. The <i>esp1396IC</i> gene in pEsp <sup>+4</sup> CR::Lac contains four extra nucleotides resulting in +1 frameshift mutation                                                                                                                                                                                                                                                                                                                                                                                                                        |
| pEsp <sup>+12</sup> CR::Lac | <i>R</i> ::' <i>lacZ</i>             | Tc              | Obtained after the insertion of octanucleotide GAGATCTC into <i>Xba</i> I-digested and blunted pEspCR::Lac. The <i>esp1396IC</i> gene in pEsp <sup>+12</sup> CR::Lac contains 12 extra nucleotides resulting in four additional amino acid residues within the regulatory protein                                                                                                                                                                                                                                                                                                                                                                                                                                              |
| pZS-C <sup>c</sup>          | <i>C</i>                             | Km              | The gene for <i>C.Esp1396I</i> was amplified using primers 5'-CAG <u>GTA CCG</u> AAT AGA AAA TAT TAG TTA TGG AA-3' and 5'-GAC <u>GCG TTT</u> AGT CAT GCT TTA AAA TCT CC-3' ( <i>Kpn</i> I and <i>Mlu</i> I targets introduced into primer sequences are underlined), <i>Taq</i> DNA polymerase, plasmid pEsp1396IRM5.6 as template and following reaction conditions: initial denaturation, 95°C, 2 min; denaturation, 95°C, 1 min; annealing, 58°C, 1 min; extension, 72°C, 30 seconds; number of cycles, 30. PCR fragment of 0.2-kb was cleaved with <i>Kpn</i> I and <i>Mlu</i> I and inserted into pZS*24-MCS-1 pre-cleaved with <i>Kpn</i> I- <i>Mlu</i> I. The inserted sequence was verified by dideoxy sequencing (6). |

<sup>a</sup> *R, M, C* - genes for *Esp1396I* Enase, Mtase and regulatory protein, respectively

<sup>b</sup> Introduction of pEspM::Lac into *E. coli* was carried out using the host cells which expressed the *Esp1396I* repressor gene located within the plasmid pBR-C

<sup>c</sup> Gene for regulatory protein is under the control of promoter P<sub>lac/ara-1</sub>

## References

1. Yanish-Perron,C., Vieira,J., Messing,J. (1985) Improved M13 phage cloning vectors and host strains: nucleotide sequences of the M13mp18 and pUC19 vectors. *Gene*, **33**, 103-119.
2. Chang,A.C.Y., Cohen,S.N. (1978) Construction and characterization of amplifiable multicopy DNA cloning vehicles derived from the P15A cryptic miniplasmid. *J. Bacteriol.*, **134**, 1141-1156.
3. Bolivar,F., Rodriguez,R.L., Greene,P.J., Betlach,M.C., Heyneker,H.L., Boyer,H.W., Crosa,J.H., Falkow,S. (1977) Construction and characterization of new cloning vehicles. II. A multipurpose cloning system. *Gene*, **2**, 95-113.
4. Lutz,R., Bujard,H. (1997) Independent and tight regulation of transcriptional units in *Escherichia coli* via the LacR/O, the TetR/O and AraC/I1-I2 regulatory elements. *Nucleic Acids Res.*, **25**, 1203-10.
5. Minton,N.P. (1984) Improved plasmid vectors for the isolation of translational *lac* gene fusions. *Gene*, **31**, 269-273.
6. Sanger,F., Nicklen,S., Coulson,A.R. (1977) DNA sequencing with chain-terminating inhibitors. *Proc. Natl. Acad. Sci. USA*, **74**, 5463-5467.
